## Evoked and spontaneous pain assessment during tooth pulp injury

Heather Lynn Rossi<sup>1</sup>, Lily Pachanin See<sup>2,5</sup>, William Foster<sup>1</sup>, Saumitra Pitake<sup>1</sup>, Jennifer Gibbs<sup>3</sup>, Brian Schmidt<sup>4</sup>, Claire H. Mitchell<sup>5</sup>, Ishmail Abdus-Saboor<sup>1\*</sup>

<sup>1</sup> Department of Biology, University of Pennsylvania, Philadelphia, PA

<sup>2</sup> Department of Endodontics, University of Pennsylvania, Philadelphia, PA

<sup>3</sup> Department of Endodontics, Harvard University, Boston, MA

<sup>4</sup> Department of Oral and Maxillofacial Surgery, New York University, New York, NY

<sup>5</sup> Department of Basic and Translational Science, University of Pennsylvania, Philadelphia, PA

\*Corresponding author: [ishmail@sas.upenn.edu](mailto:ishmail@sas.upenn.edu)

### Abstract

Injury of the tooth pulp is excruciatingly painful and yet the receptors and neural circuit mechanisms that transmit this form of pain remain poorly defined in both the clinic and preclinical rodent models. Easily quantifiable behavioral assessment in the rodent orofacial area remains a major bottleneck in uncovering molecular mechanisms that govern inflammatory pain in the tooth. Here we use a dental pulp injury model in the mouse and expose the tooth pulp to the outside environment, a procedure we have previously shown produces pulpal inflammation. We demonstrate here with RNAscope technology in the trigeminal ganglion of injured mice, an upregulation of genes that contribute to the inflammatory pain state. Using both evoked and spontaneous measures of pain in the orofacial area, including application of von Frey Hair filaments and pain feature detection with the mouse grimace scale, we reveal a differential timeline of induction of spontaneous pain versus mechanical allodynia following pulpal injury. This work demonstrates that tooth pain can be easily assessed in freely behaving mice using approaches common for other types of pain assessment. Harnessing these assays in the orofacial area during gene manipulation should assist in uncovering mechanisms for tooth pulp inflammation and other forms of trigeminal pain.

## 1 Introduction

2 Pain from the infected tooth pulp (pulpitis) can be unrelenting and many patients report  
3 this form of pain as the most intense type of pain they have ever experienced<sup>1</sup>. Mechanical  
4 hypersensitivity of the tooth is associated with greater pain intensity ratings overall<sup>2</sup>. Prevailing  
5 treatment options for painful pulpitis consists of pulp or tooth removal, which can have lasting  
6 consequences for dental function and in some patients there may still be lingering pain<sup>3,4</sup>.  
7 Therefore, there is a critical need for development of new therapeutic approaches that alleviate  
8 tooth pain while leaving pulpal issue intact and avoiding complex dental procedures. Moreover,  
9 untreated ongoing inflammation of the pulp can lead to more widespread nociceptive  
10 hypersensitivity in trigeminal tissues, an issue further compounded in individuals who cannot  
11 afford proper dental treatment<sup>5</sup>. The era of new innovative approaches to treat tooth pain will be  
12 driven by an increase in our fundamental understanding of the genes and neural circuit pathways  
13 that drive tooth pain states. However, we first need to establish feasible and objective behavioral  
14 paradigms that measure pain in the orofacial area in preclinical rodent models.

15  
16 Clinically, mechanical hypersensitivity and spontaneous pain are particularly problematic  
17 for patients<sup>2-4</sup>, and there are behavioral assessment tools for these in rodent models. To date,  
18 only a handful of studies using the tooth pulp injury model have examined mouse behavior, and  
19 these studies have not incorporated some of the common assays used to measure pain  
20 hypersensitivity<sup>6-8</sup>. The predominant assessment tool for mechanical pain measurement in  
21 rodents are reflexive withdrawal assays in which calibrated von Frey hair filaments (VFHs) are  
22 applied to the hind paw and the experimenter decides which filaments evoke an animal's  
23 withdrawal<sup>9</sup>. We have recently improved on this method by incorporating high-speed  
24 videography, statistical modeling, and machine learning to more objectively assess the mouse  
25 pain state following hind paw stimulation<sup>10</sup>. VFHs can also be applied to the face, but this  
26 presents more challenges because the animal's attention is more engaged with the stimulus, as  
27 we have previously experienced<sup>11</sup>. However, recent elegant work in freely behaving mice used  
28 both VFH stimulation of the whisker pad and optogenetic activation of trigeminal nociceptors to  
29 uncover a craniofacial neural circuit for pain<sup>12</sup>, so it is not impossible.

30  
31 Another approach to measure spontaneous pain in rodents is a paradigm called the Mouse  
32 Grimace Scale (MGS), that interrogates facial expressions including the positioning of the mouse  
33 nose, cheek, ear, eye, and whiskers<sup>13,14</sup>. An advantage of the MGS over reflexive assays is that  
34 spontaneous pain resembles pain reports in the clinic and facial expressions are used in the clinic  
35 to measure pain in infants, although these assays are currently not as high-throughput in rodents  
36 as delivering stimuli and recording immediate responses. Together however, both reflexive and  
37 spontaneous measurements of pain provide advantages in that they can be performed without  
38 anesthesia, invasive implants, or time intensive tasks performed by the animal that require long  
39 term learning and memory, which may mean that interpretation of the behavior may be  
40 confounded by factors outside of the animal's pain level.

41  
42 Here we take advantage of existing pain assays, with some custom modifications, and  
43 adapt them for behavioral analyses during tooth pulp inflammation. After morphologically  
44 confirming our tooth pulp injury model, we used RNAscope technology to determine the time  
45 course of changes in molecular mediators of nociception relative to behavioral changes. To the  
46 best of our knowledge, this is the first study using the MGS to evaluate pain following dental

47 injury, and our results revealed the occurrence of spontaneous pain within the first day following  
48 dental injury. We also adapted previous facial Von Frey methods<sup>15</sup> to evaluate mechanical  
49 sensitivity, relying on the published scoring scheme, as well as the animals' willingness to put its  
50 head through a custom designed chamber with an adjustable opening for stimulation. Because  
51 the mice can decide if they want to expose their faces to the stimuli, we were also able to record  
52 the threshold in which mice are no longer inquisitive enough to tolerate facial stimuli, and this  
53 pain threshold was able to segregate injured versus sham mice. Interestingly, these two assays  
54 present a different time course following injury, indicating spontaneous pain early and  
55 throughout the 6 day observation period, while mechanical allodynia is delayed. Taken together,  
56 the behavioral assays we have defined here to assess tooth pain should make it easier for  
57 researchers to adopt these approaches to aid in uncovering mechanisms for tooth pain.

58  
59

## 60 Results

61

### 62 Morphological and gene expression changes twenty-four hours after tooth pulp exposure

63

64 In order to study inflammatory tooth pain, we used the dental pulp injury (DPI) model that we  
65 have previously described<sup>6</sup> in which the dental pulp of one maxillary molar tooth is mechanically  
66 exposed using a dental drill, producing pulpitis. We began our first analyses 24 hours post-  
67 injury, and confirmed controlled removal of enamel and dentin and exposure of the pulp

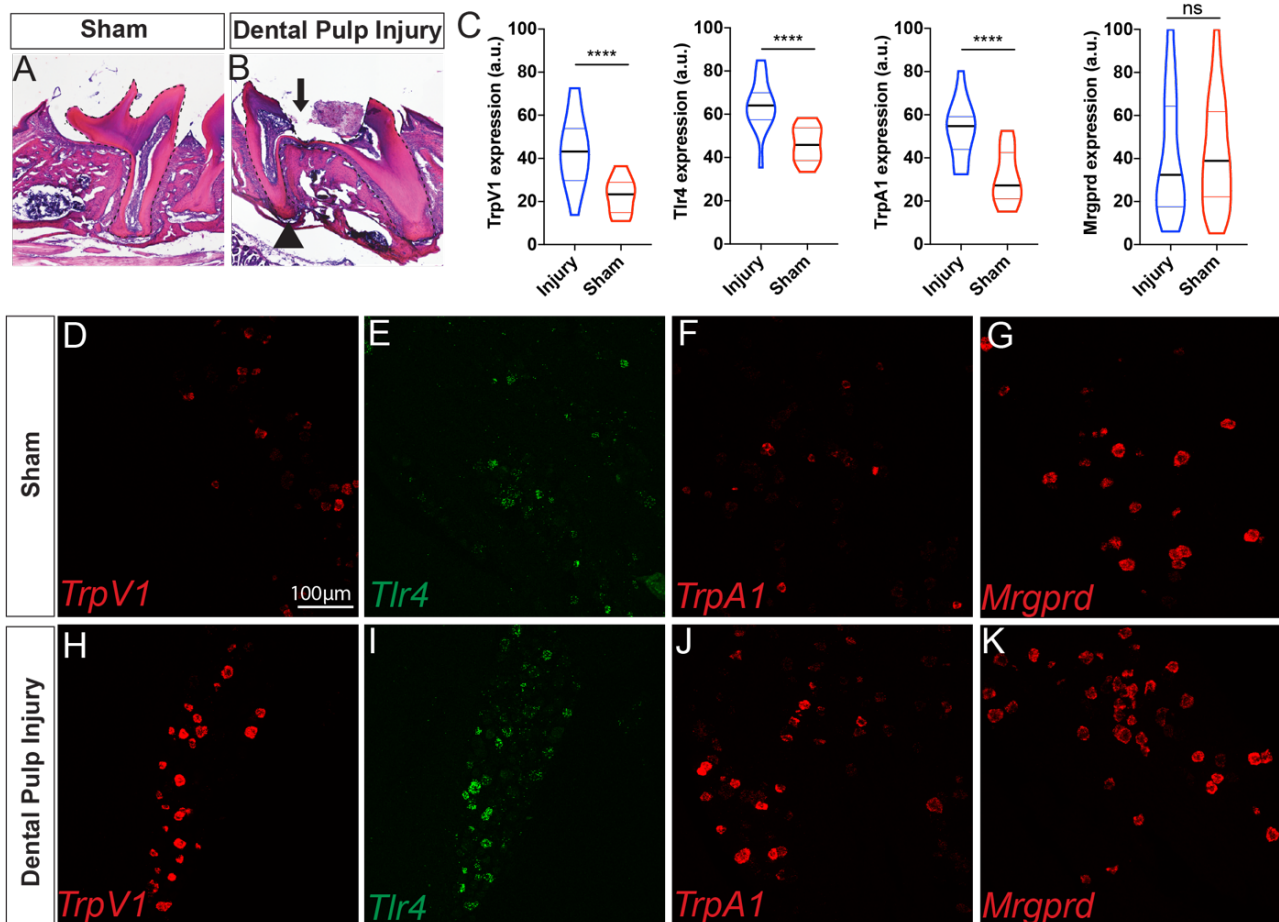

**Figure 1. Changes in tooth morphology and trigeminal ganglia transcript levels 1 day following pulp injury.** (A) Intact first maxillary molar from a sham animal and (B) injured maxillary molar with pulp exposure evident. Dotted outline marks the molar and the arrow indicates the exposure site. Healthy pulp is still evident on either side of the opening, and compacted foreign material (next to arrow) was present in the cavity. (C) Violin plot of quantified fluorescence intensity measured in arbitrary units (a.u.) defined in ImageJ for TrpV1, Tlr4, TrpA1, and Mrgprd in the trigeminal ganglia of injured (blue, n = 3 mice) or sham/naive (red, n = 3 mice) mice. (D-G) Representative images of RNAscope in situ hybridization following sham and (H-K) 1 day after dental pulp injury. \*\*\*\* is  $p < 0.0001$  for an unpaired T-test.

68 occurred in the molars of DPI mice (Fig. 1A,B). Foreign material was microscopically present in  
69 the tooth cavity of all 3 DPI mice, sometimes in contact with the pulp (material next to arrow in  
70 Fig. 1B), demonstrating that an exposed pulp collects materials from the mouse's outside  
71 environment. Importantly, the pulp was still present and clearly exposed, and not yet necrotic,  
72 within the injury site at 24 hours (arrow Fig. 1B).

73  
74 Next, we utilized RNAscope technology for a sensitive read-out of RNA levels in the  
75 trigeminal ganglion of genes implicated in both nociceptive and inflammatory responses. The  
76 cell bodies of the primary afferent neurons that innervate the dental pulp reside in the trigeminal  
77 ganglion<sup>24</sup>. We chose to assess the Toll-like Receptor 4 (Tlr4), transient receptor potential  
78 channels vanilloid 1 and ankyrin 1 (Trpv1 and Trpa1), and the mas-related G protein coupled  
79 receptor D (Mrgprd), because all are found in neurons that innervate the dental pulp<sup>7,20,22,25-27</sup>  
80 and could be involved in the development of either spontaneous or mechanical pain in the  
81 context of infection and injury. In particular, TLR4 is part of a larger class of receptors that  
82 recognize pathogen- and damage- associated molecular patterns (PAMPs and DAMPs)<sup>19</sup>, and  
83 has known interactions with both TRPV1 and TRPA1 in the context of dental injury<sup>20-23</sup>. A  
84 direct role for Mrgprd in dental injury-related pain has not been established, but is possible given  
85 its expression in dental afferents<sup>25</sup> and its role in cutaneous mechanical pain perception<sup>28</sup>. We  
86 found that the PAMP/DAMP family member Tlr4 was upregulated in DPI versus sham mice  
87 (Fig. 1C,E,I), as were the associated nociceptive channels TrpV1 (Fig. 1C,D,H), and TrpA1 (Fig.  
88 1C,F,J). However, we did not observe an increase in the mechanosensitive nociceptor marker  
89 Mrgprd at 24-hours following DPI, suggesting that gene expression changes of this nociceptive  
90 membrane protein may not be driving the earliest phases of pain in the DPI model (Fig. 1C,G,K).

91  
92 **Mouse grimace scale reveals presence of spontaneous pain beginning one day following**  
93 **pulp exposure**

94  
95 To assess spontaneous pain in freely behaving DPI and sham mice, we moved mice into clear  
96 custom-made chambers and recorded video of their faces. Still images were selected from these  
97 videos for assessment with the MGS (Fig. 2A). All mice, regardless of treatment exhibited very  
98 low MGS scores at baseline, which was not different between the assigned treatment groups and  
99 was not significantly affected by the sham treatment (Fig. 2). We found a significant increase in  
100 the MGS at all post-exposure time points captured (Fig. 2C, there was a significant effect of time,  
101  $F_{3,30} = 5.776$   $p = 0.0031$ , treatment  $F_{1,10} = 18$   $p = 0.0017$ , and a significant interaction,  $F_{3,30} = 12.75$   
102  $p < 0.0001$ ). The MGS features that differed in the DPI group versus sham were the pulling back  
103 of the ears, nose and cheek bulging, as well as orbital tightening (Fig. 2B). These results are

104 consistent with the previous report showing that MGS scores are highest for pain emanating from  
105 internal organs<sup>13</sup>, demonstrating that this assessment tool can be successfully co-opted for  
106 painful pulpitis. This finding also indicates that mice experience ongoing pain within the first  
107 day following pulp exposure that persists throughout the observation period.

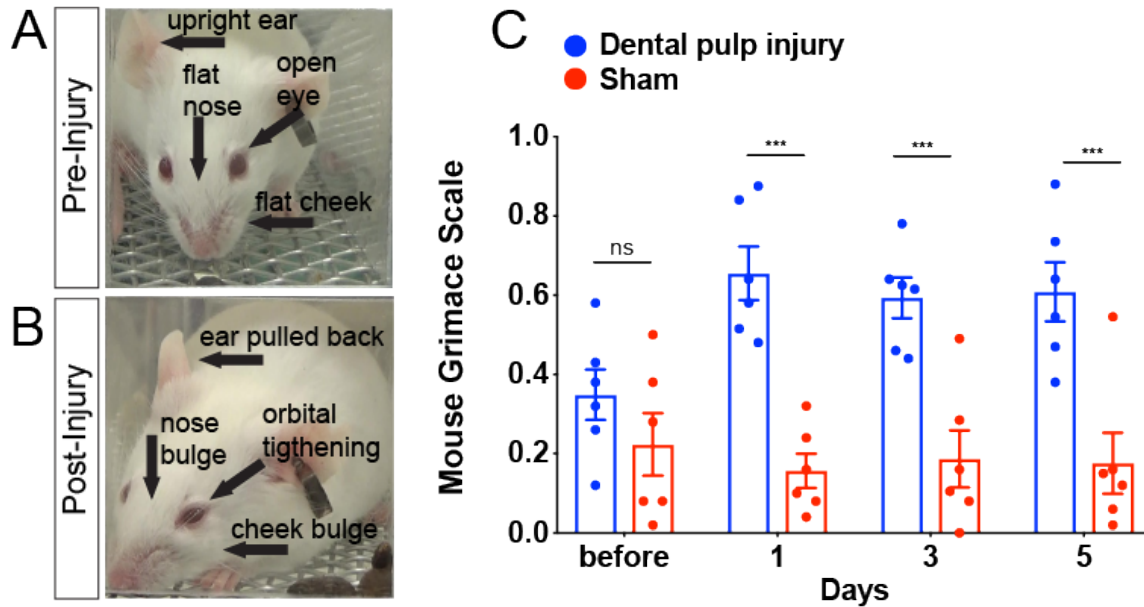

**Figure 2. Mouse Grimace Scale following pulp exposure.** (A) Before injury mice have low or no score for each of the action units, while after injury (B) prominent presence of the action units, as labeled on the example images from the same mouse. (C) We found a significant increase in the Mouse Grimace Score at all post-exposure time points captured, n = 6/treatment, Dental Pulp Injury (blue) and sham (red). \* indicates  $p < 0.0001$  within the pulp exposed group before vs. after (Dunnett's post-hoc).

108

### 109 Mechanical allodynia in the face is fully developed by day 4 post pulp exposure and 110 worsens

111

112 To determine how mice respond to evoked stimuli, we applied von Frey hair filaments to the  
113 skin between the whisker pad and eye in DPI and sham mice and recorded nocifensive  
114 behavioral responses associated with withdrawal from the stimulus. Although our stimulus did  
115 not touch the tooth directly, we hypothesized that we might observe hypersensitivity in the  
116 orofacial skin surrounding teeth, which would indicate a more widespread trigeminal  
117 sensitization, reminiscent of findings in the clinic when treatment complications arise<sup>29,30</sup>.  
118 Additionally, mice had to poke their heads through our custom-made chambers to allow the  
119 VFHs to make contact with the facial skin. Using this paradigm, we observed that unilateral  
120 exposure of tooth pulp on one molar changes response scores and thresholds for Von Frey  
121 stimulation on both sides of the face suggestive of mechanical allodynia (Figs.3-5). The earliest  
122 significant change was an increase in response scores across all VFHs averaged together, at day  
123 2 on the contralateral side (Fig.3B, Contralateral: a significant effect of time:  $F_{3,30} = 6.43$   $p = 0.0017$ ,  
124 a significant interaction:  $F_{3,30} = 7.69$   $p = 0.0006$ , but no significant effect of treatment  
125 alone:  $F_{1,10} = 2.272$   $p = 0.1626$ ). By day 4, response scores are significantly increased in pulp-



126 exposed mice on both sides, which persists on day 6 (Fig. 3B, Ipsilateral: significant effect of  
 127 time:  $F_{3,30} = 3.302$   $p = 0.0336$ , no significant effect of treatment alone:  $F_{1,10} = 2.34$   $p = 0.1571$ , but  
 128 significant interaction:  $F_{3,30} = 4.836$   $p = 0.0073$ ). Overall this indicates that injured mice, but not  
 129 shams, exhibit a gradual increase in response scores that is most evident on day 4 and maximal  
 130 on day 6.

131 We also examined the threshold where animals either scored a 3 or refused stimulation.  
 132 Raw thresholds (Fig. 3C) were log-transformed to better conform to normality (Fig. 3D) and  
 133 statistical analysis of transformed data indicated a significant decrease from baseline threshold  
 134 on both ipsilateral and contralateral sides beginning at day 4 post pulp exposure. On day 6, the  
 135 thresholds of pulp exposed mice were significantly lower than shams (a significant effect of  
 136 time: ipsilateral -  $F_{3,30} = 6.981$   $p = 0.0011$ , contralateral -  $F_{3,30} = 6.842$   $p = 0.0012$ , of treatment  
 137 ipsilateral -  $F_{1,10} = 7.424$   $p = 0.0214$ , contralateral -  $F_{1,10} = 4.981$   $p = 0.0497$ , and interaction  
 138 ipsilateral -  $F_{3,30} = 5.599$   $p = 0.0036$ , contralateral -  $F_{3,30} = 4.01$   $p = 0.0164$ ).

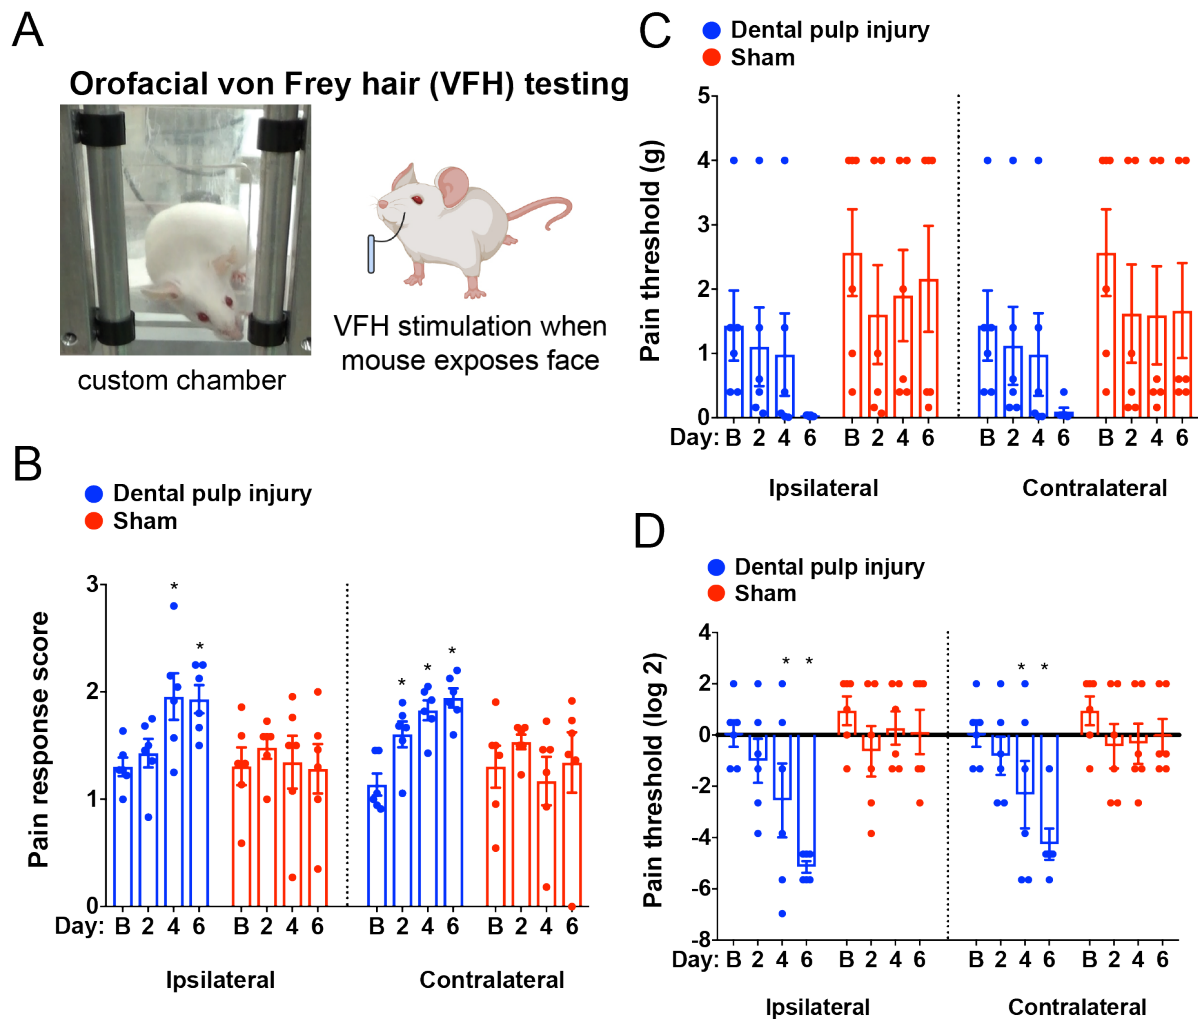

139  
 140  
 141  
 142  
 143

**Figure 3. Facial Von Frey apparatus, response scores, and threshold changes following pulp exposure.** (A) The mice were placed in the chamber for testing, which has adjustable openings that can be closed between tests and allows mice to put their head past the bars if they choose. When mice choose to expose their faces they are stimulated as depicted with a von Frey hair. (B) After dental pulp injury (blue) there is a significant increase in pain response scores across all of the filaments tested, which is not observed in sham-treated mice (red). This is evident from day 4 onward on the ipsilateral side, and on day 2 onward on the contralateral side. (C) Raw threshold are significantly different from normality according to the Shapiro-Wilks Test, but a decrease with time is apparent in the injured group not observed in sham mice. (C) After log transformation of threshold data to conform to normality, we find a significant decrease in threshold following pulp exposure on both sides, evident from day 4 and significantly lower than shams at day 6. \* indicates  $p < 0.05$  for the indicated time point versus baseline (Dunnett's post-hoc).

144

145

146

147

148

149

150

151

152

153

154

155

156

157

158

159

160

161

162

Next, we analyzed our Von Frey data in two different ways guided by the response score and the "break point" built into the assay design. The apparatus allows the mouse to learn over time that their natural urge to explore may result in mechanical stimulation to a hyperalgesic area, at which point they might choose not to expose their face through the opening and no stimulation would occur, i.e. their "break point". This may occur in the sham group also at the higher stimulus intensities as they are repeatedly tested. There is a large degree of disagreement in the field regarding what filament ranges constitute normally "painful" vs "non-painful" stimulation in the absence of injury or damage, which we have attempted to address for hind paw stimulation with VFHs<sup>10</sup>. Often this determination is made arbitrarily by the investigators based on human perception. Here, we use the Von Frey response scores and the break point to determine what range of filament weights correspond to a "non-painful" versus "painful" range. First, we examined the response scores by the weight of each VFH filament, to determine if they were higher across all intensities, which would suggest the presence of allodynia and hyperalgesia. Pulp exposed mice exhibit increasing response scores over time, particularly at lower filament weights (0.008-0.16g) on both sides (Fig.4A,C), which is not exhibited by the sham mice (Fig.4B,D). This seems to indicate mechanical allodynia in the injured group.

163

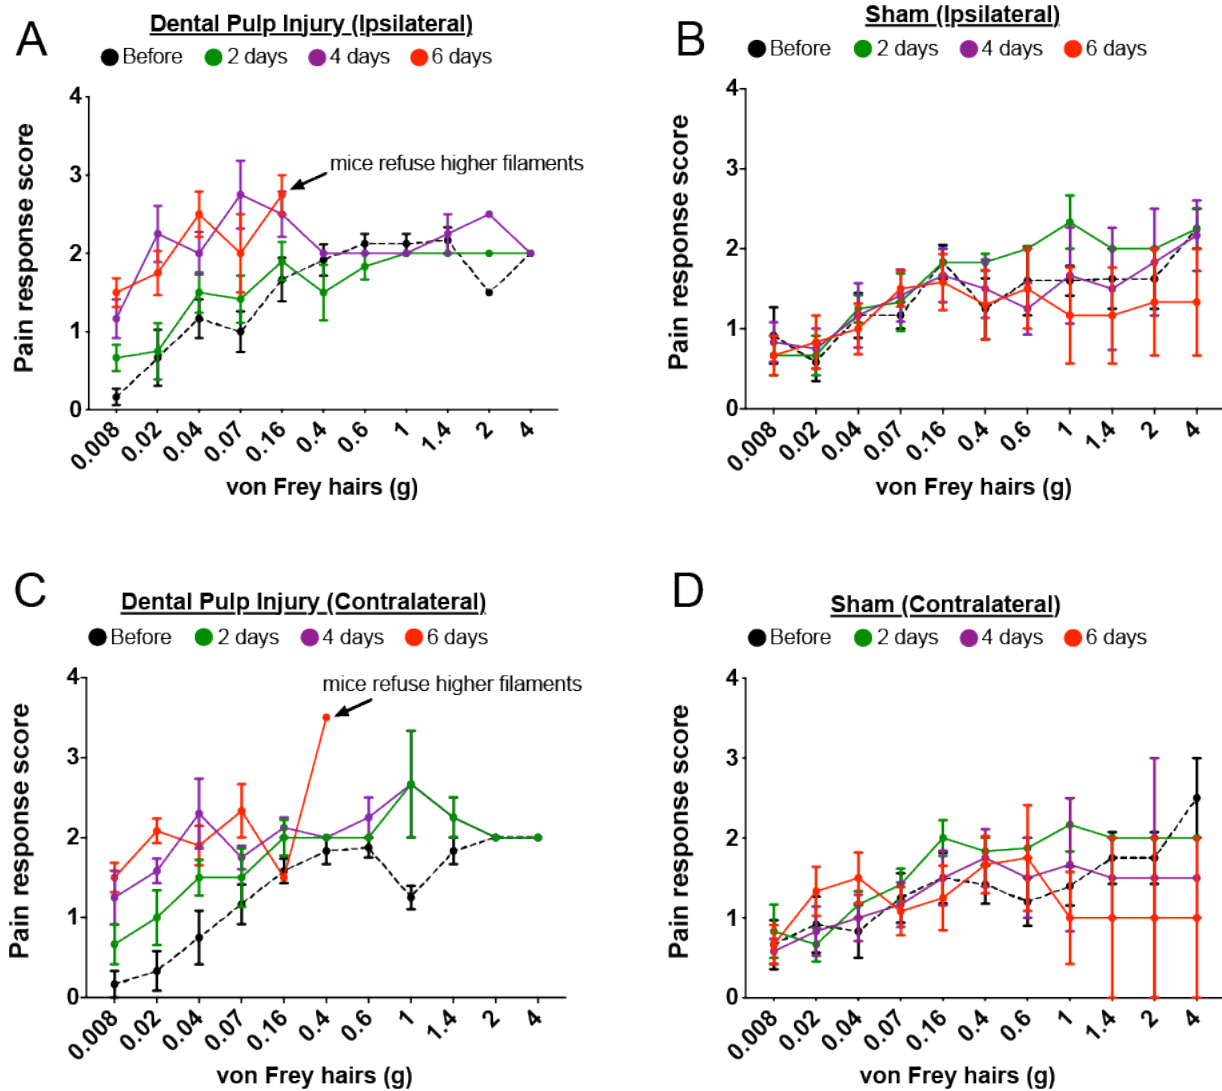

164

**Figure 4. Von Frey pain response score by filament intensity and day post-injury or sham.** (A) Ipsilateral and (C) contralateral response scores for low intensity filaments are increased at day 4 (purple) following injury, and by day 6 (red) mice met threshold criteria or refused filaments higher than 0.16 or 0.4g. In contrast, (B) ipsilateral and (D) contralateral scores were similar across days post-sham procedure and low filament scores did not increase over time.

165

166

167

168

169

170

171

Second, we determined the weight of filaments that correspond to the break point (when the mouse takes more than 5 minutes to pass its face out of the opening) for both DPI and sham mice for each testing day. As time following pulp exposure increases, the intensity of the filaments where the mice indicate stimulation should stop becomes lower on both sides (Fig.5A,C), such that by day 6 the break point occurs at 0.4g ipsilateral and 0.6g contralateral. In



172 contrast, although there is some change in the number of sham mice that tolerate stimulation with  
173 filaments above 0.4g after 7 tests, at least two mice tolerated the entire range of filaments during  
174 every test (Fig.5B,D). Taken together this indicates that exposure of one tooth pulp results in a  
175 progressive development of mechanical allodynia, which is fully realized on day 4 post-exposure  
176 and increases in severity by day 6.  
177

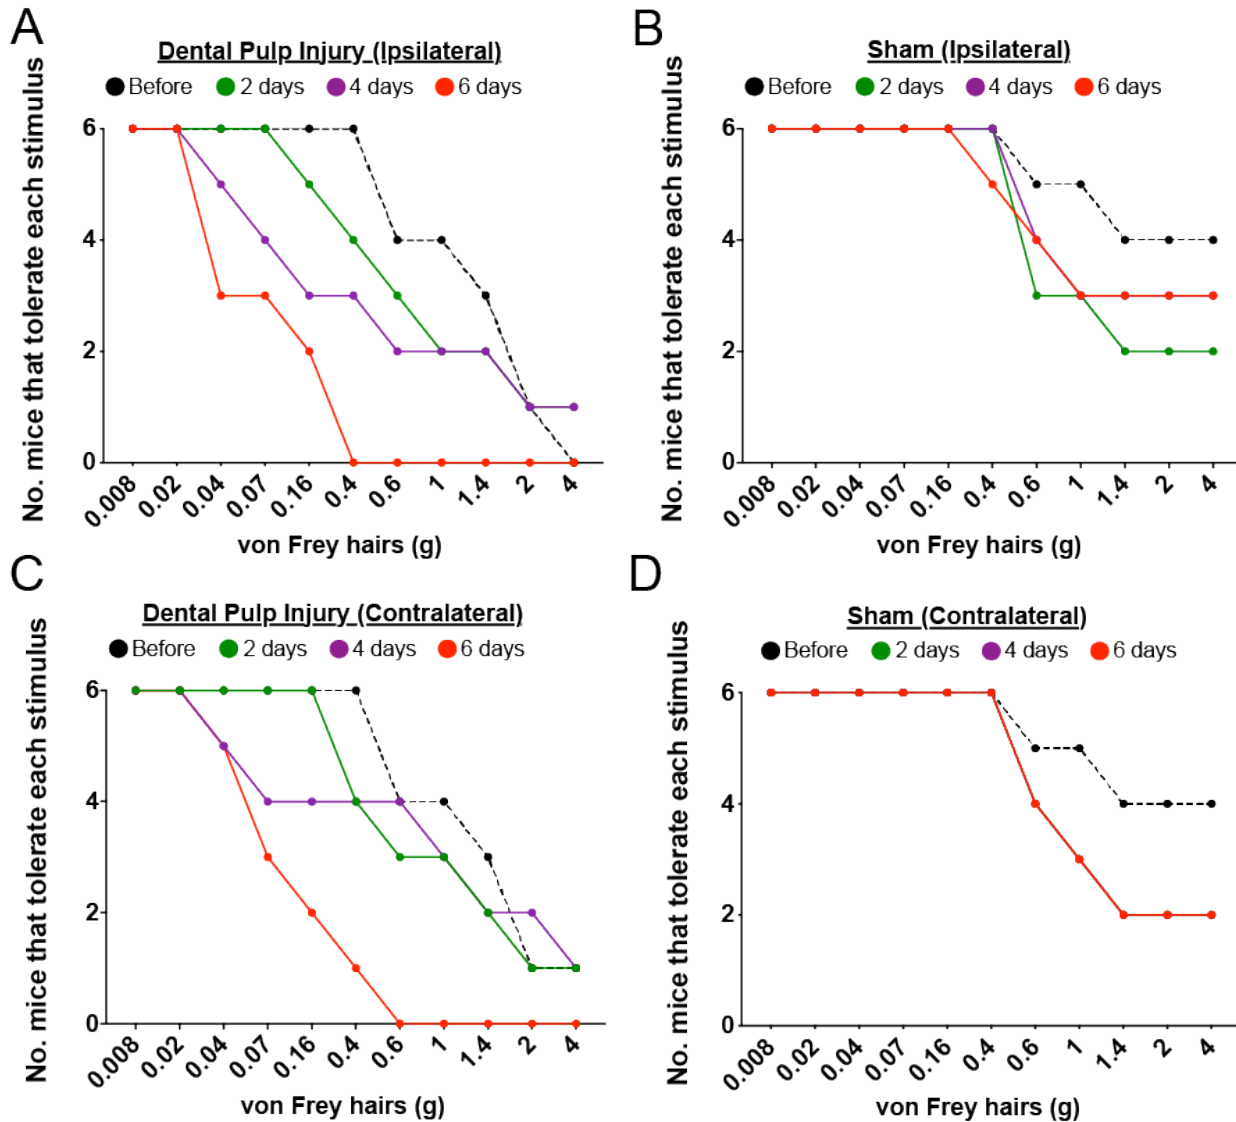

**Figure 5. Loss of mouse participation by stimulus intensity (the break point) before and after injury or sham.** On the (A) Ipsilateral and (C) contralateral sides, there is a progressive decrease in the number of injured mice willing to tolerate filaments higher than 0.4g, such that by day 6 none of them progressed further than 0.16g (ipsilateral) or 0.4g (contralateral). In contrast, on the (B) ipsilateral and (D) contralateral sides the sham cohort consistently tolerated testing with lower intensity filaments and at least two mice tolerated all the filaments across all testing days.

178

## 179 Discussion

180

181 In this study, we found that unilateral pulp exposure injury in mice to the first maxillary molar  
182 resulted in a statistically significant increase in MGS from the first 24 hours onward, which  
183 indicates increased spontaneous pain. The pulp was still present at this time, but clearly exposed  
184 when examined histologically, supporting that the behavior could capture pain originating from  
185 the dental pulp, modeling pulpitis. Surprisingly, mechanical allodynia, as assessed by Von Frey  
186 filament testing, progressed more gradually, with initial changes in scores observed only on the  
187 contralateral side on day 2 post-injury, significant increases seen on both sides at day 4, and  
188 unwillingness to tolerate filaments above 0.6g by day 6 post-injury. This work demonstrates that  
189 we have clear easily identifiable behavioral readouts for tooth pain in the mouse. Associated with  
190 these behavioral changes, we observed significant increases in transcript levels of Tlr4, Trpv1,  
191 and Trpa1, but not Mrgprd, in the ipsilateral TG of injured mice as compared to controls at 24  
192 hours post-injury. Taken together and in support of previous literature, we believe these findings  
193 may suggest that Tlr4, Trpv1, and Trpa1, may contribute to early changes resulting in the  
194 presentation of spontaneous pain, as indicated by the MGS. However, this does not rule out a  
195 role for Mrgprd in the progressive development of mechanical allodynia that seems to worsen  
196 around 4 days following pulp-exposure injury. Based on existing literature from other body  
197 regions, TRPA1 could serve as a bridge between the early signaling indicated here and a  
198 hypothesized later process involving MRGPRD, which we will discuss in further detail below.

199

200 Part of our objective in this study was to establish a time course of behavioral changes  
201 associated with tooth pulp exposure injury, which is considered by many to be a translationally  
202 relevant model for pulpitis<sup>6,31</sup>. To our knowledge, this is the first assessment of MGS following  
203 tooth pulp exposure injury, and somewhat surprisingly the first for facial Von Frey in mouse  
204 with this model as well. MGS and the rat equivalent RGS are significantly elevated following  
205 other types of dental pain, including tooth movement<sup>32</sup> and mechanical load injury to the  
206 temporomandibular joint (TMJ)<sup>33</sup>, but in both of these cases, the elevation in score is transient,  
207 likely only corresponding with the presence of acute mechanical load. Our elevation in score  
208 does not subside, possibly due to the more invasive nature of the injury and the fact that ongoing  
209 inflammation is not being treated. In agreement with this idea, in a chronic model of trigeminal  
210 neuropathic pain, significant change in MGS is observed 10 days following the constriction  
211 injury<sup>34</sup>. It is possible, however, that there may be site or model specific differences. MGS was  
212 only transiently elevated following Complete Freund's Adjuvant inflammation of the TMJ<sup>35</sup>,  
213 which does not have ongoing infection occurring in the model. In terms of change in the score,  
214 our data reflect a similar to slightly greater increase in MGS as compared to tooth movement<sup>32</sup>,  
215 and potentially within the lower end of ranges reported for an exogenous-CGRP migraine  
216 model<sup>36</sup> and neuropathic injury of the infraorbital trigeminal nerve<sup>34</sup>. This indicates that the  
217 mice are likely in a level of discomfort or pain similar to other experimental pain states.  
218 Spontaneous pain is diagnostically associated with irreversible pulpitis, supporting the  
219 translational relevance of our findings<sup>29</sup>.

220

221 In addition to spontaneous pain, greater than 50% of patients with irreversible pulpitis  
222 also have mechanical allodynia with percussion of the tooth, and these patients have higher  
223 ratings of spontaneous pain than those without allodynia<sup>29</sup>. Facial Von Frey, an equivalent  
224 means of testing mechanical sensitivity in rodents is challenging, but not impossible in the

225 mouse. Mechanical allodynia in the face has been examined in other experimental paradigms,  
226 but has not been published following tooth pulp exposure injury. Most studies have used rats as  
227 the model animal, and only one of these used the exact model we use here, where the pulp is left  
228 exposed and not treated with exogenous substances<sup>31</sup>. Our findings are in agreement with this  
229 previous work in rats. Tsuboi and colleagues also observed a reduction in threshold both  
230 ipsilateral and contralateral to the injury, first detectable at day 3, which worsened at day 5 and  
231 persisted at least 3 weeks later<sup>31</sup>. This period of time around day 3 or day 4 seems to mark a  
232 transitional state between the acute inflammatory response and development of pathological pain  
233 states often associated with chronic or ongoing pain. We speculate that the early change in MGS  
234 may be established by either the same or different mechanisms than those that produce  
235 mechanical allodynia later.

236  
237 To begin to address this question, we examined the mRNA expression of Tlr4, trpv1,  
238 Trpa1, and Mrgprd using *in situ* hybridization at 24 hours following pulp exposure injury. A  
239 great deal of attention has been paid to TLR4 as a possible drug target for the treatment of  
240 inflammatory pain in various parts of the body<sup>19</sup>, but particularly in pulpitis given its role in  
241 recognizing molecular signals of bacterial presence and mechanical injury and upregulation in  
242 human pulpitis samples<sup>20</sup>. Furthermore, antagonism of TLR4 is associated with reversal of  
243 pain-associated behaviors in two different rat models of pulpitis<sup>7,37</sup>, including mechanical  
244 hypersensitivity in lightly anesthetized rats<sup>37</sup>. Our findings of increased Tlr4 in the trigeminal  
245 ganglia 24 hours following pulp injury suggest an association between the function of this  
246 receptor and at least increased malaise or spontaneous pain associated with increased MGS. We  
247 need to directly antagonize TLR4 in the context of pulp-exposure injury to verify causality for  
248 increased MGS and determine if early intervention might prevent the delayed presentation of  
249 mechanical allodynia. It is possible that TLR4 upregulation begins a cascade of molecular  
250 events, as of yet not clearly identified, that establish a change in mechanical sensitivity.

251  
252 Coinciding with the increase in TLR4 we also observed an increase in Trpv1 mRNA  
253 expression at 24 hours post injury, similar to increased protein expression found in rats with pulp  
254 exposure or CFA-induced pulpitis models<sup>7,38</sup>. Upregulation of the nociceptive channel TRPV1  
255 has been demonstrated within 24 hours of LPS application to the tooth pulp, but returned to  
256 control levels 3 and 5 days later<sup>26</sup>. Furthermore, LPS can directly act on TRPV1+ trigeminal  
257 nociceptors via TLR4 signaling<sup>21</sup>. Antagonism of TRPV1 in the CFA model blocks mechanical  
258 hypersensitivity in lightly anesthetized rats<sup>38</sup>, suggesting that TRPV1 could be involved in the  
259 development of mechanical allodynia in our pulpitis model. However, given the delayed  
260 progression of mechanical allodynia reported here, it is likely that other events downstream of  
261 the increased TRPV1 expression in the ganglia are also involved in the pulp exposure model.

262  
263 We also observed an increase in the expression of Trpa1 in the ipsilateral TG at 24 hours  
264 post-injury. TRPA1 is also of interest in the pathology of painful pulpitis, but only one other  
265 study has examined protein expression following pulp exposure injury in rat molar<sup>39</sup>. They also  
266 observed increased expression of TRPA1, but it was not significant until Day 4<sup>39</sup>. Our differing  
267 results may be due to species differences, or may reflect a disconnect between the time to peak  
268 mRNA levels versus protein levels. Like TRPV1, there is also evidence for an interaction  
269 between TLR4 or LPS and TRPA1-related activity. In the DRG, there is evidence that TRPA1 is  
270 required for direct nociceptor responses to LPS, even in the absence of TLR4<sup>22</sup>. LPS increases

271 the percentage of trigeminal neurons responding to the TRPA1 agonist acyl-isothiocyanate  
272 (AITC) as demonstrated by calcium imaging<sup>23</sup>. TRPA1 has been implicated in the development  
273 of mechanical allodynia in the lower body<sup>40</sup>, thus could be involved in the mechanical allodynia  
274 reported here.

275  
276 While we observed increased expression of *Tlr4*, *Trpv1*, and *Trpa1* 24 hours post pulp  
277 exposure, we did not observe an increase in *Mrgprd*, also found in the pulp<sup>25</sup> and directly  
278 implicate in cutaneous mechanical nociception<sup>28,41</sup>. However, this does not completely rule  
279 involvement of *Mrgprd*+ trigeminal neurons in the development of delayed mechanical  
280 allodynia. Future studies will evaluate the expression of *Mrgprd* closer in time to the  
281 manifestation of mechanical allodynia around day 3 or 4. It is also possible that TRPA1 could  
282 serve as a mechanistic bridge between the early upregulation of TLR4 and TRPV1 and a  
283 currently unverified but likely later involvement of *Mrgprd* following tooth pulp exposure injury.  
284 In the DRG recent studies suggest that TRPA1 exists as part of two populations, one that is co-  
285 localized with TRPV1 and/or TLR4 in a primarily peptidergic population, which has been the  
286 dogma for this channel until very recently, and the other non-peptidergic population containing  
287 MRGPRD<sup>42</sup>. Functional studies suggest that at baseline functional TRPA1 protein is actually  
288 more frequent in the IB4 positive "non-peptidergic" cell population, which contains MRGPRD,  
289 than in the CGRP+ population<sup>42</sup>. The authors suggest that the interaction between TRPA1 and  
290 *Mrgprd* may be broadly important for the development of mechanical allodynia<sup>42</sup>. Very recent  
291 evidence suggests that *Mrgprd* activation by its agonist beta-alanine results in phosphorylation of  
292 TRPA1 via Protein Kinase A<sup>43</sup>, but it is not clear if TRPA1 may also influence any aspect of  
293 *Mrgprd* expression or function. The overlap of TRPA1 and *Mrgprd* in the tooth pulp afferents  
294 has not been explored. Alternatively, paracrine signaling in the trigeminal ganglia via gap  
295 junction connections with satellite glia<sup>37,38,44</sup> could allow for recruitment of the non-peptidergic  
296 TLR4 negative MRGPRD population by the peptidergic TLR4+/TRPV1 and/or TRPA1+ cell  
297 populations to produce the delayed mechanical allodynia we observed.

298  
299 Although *Tlr4* has been heavily examined for its ability to recognize LPS produced by  
300 gram-negative bacteria and to influence nociceptor function, it should be cautioned that this is  
301 likely not the only potential therapeutic target. Gram negative bacteria are likely to be more  
302 involved in the early stages of infection<sup>45</sup>, which may occur before patients make it to the clinic.  
303 Bacteria most highly associated with cold and heat sensitive irreversible pulpitis infections are  
304 actually gram positive<sup>46</sup>, and may influence pulp nociceptors by different mechanisms than LPS-  
305 mediated activation of TLR4 or other TLRs. Other bacterial products<sup>47</sup> or aspects of  
306 inflammation, such as oxidative stress may also recruit both TRP channel expressing  
307 nociceptors<sup>48</sup> and *Mrgprd*<sup>49</sup>. Clearly, more work is needed on our path to improving the care of  
308 endodontic patients.

309

### 310 **Authors Competing Interests Statement**

311

312 No competing interests to declare.

313

### 314 **Author Contributions**

315

316 HLR, LPS, JG, BS, CHM, and IAS designed experiments. HLR and LPS carried out  
317 experiments, and WF and SM scored florescent intensity of RNA scope images. All authors  
318 contributed to the writing and editing of the manuscript.

319

## 320 **Acknowledgements**

321

322 We thank members of the Abdus-Saboor lab for helpful discussion of this work and comments  
323 on this manuscript. This work was supported by startup funds from the University of  
324 Pennsylvania to I.A.S. and the National Institutes of Health (NIDCR) R00 grant (DE026807) to  
325 I.A.S.

326

327

## 328 **Methods**

329

### 330 **Animals**

331

332 For these studies we used male and female adult wildtype consisting of a mixed CD1 and  
333 C57BL6/J background. Mice were 17-21 weeks old at the time of testing. Mice were maintained  
334 in a standard 12:12 light dark cycle (lights on at 07:00) tested within a time range of 08:30 –  
335 13:00. Mice had access to food and water ad libitum when not being tested. All procedures  
336 were approved by the University of Pennsylvania Institutional Animal Care and Use Committee  
337 and follow the guidelines established by the National Institutes of Health.

338

### 339 **Dental Pulp Injury**

340

341 Mice were anesthetized with ketamine/xylazine (i.p. 100 mg/kg and 12.5mg/kg respectively) and  
342 positioned under a dissecting microscope and warming pad on their back, with their head  
343 supported at an angle, and their mouth propped open with forceps. After trimming the oral  
344 whiskers, the upper first maxillary molar was drilled on one side using ¼ round carbide burr until  
345 the enamel and dentin layers were breached and the pulp was exposed. This process took about  
346 5 minutes. The enamel is hard and white, the dentin is gray, and when the pulp is visible  
347 vasculature and white to pink tissue can be seen in the hole in the enamel under the microscope.  
348 Sham animals underwent the same anesthesia, positioning and oral manipulation, but their teeth  
349 were not drilled. We provided moist food and monitored body weight following the procedure.  
350 Weight loss did not exceed 10%. Mice were either used for behavioral testing on days 1-6 post  
351 procedure (n = 6/ treatment group), or were immediately euthanized on day 1 (n =3 injured) to  
352 collect tissue. The same set of mice was used for Mouse Grimace Scale and Von Frey testing,  
353 performed on alternating days.

354

### 355 **Mouse Grimace Scale**

356

357 The Mouse Grimace Scale is a scoring system developed in the laboratory of Jeff Mogil to  
358 objectively evaluate pain-like facial expressions following experimental procedures<sup>13</sup>, which has  
359 been adopted for many trigeminal pain models<sup>33,34,36</sup>, but not yet used to evaluate tooth pain in  
360 rodents. Mice (6/treatment group) were acclimated in the chambers at least twice prior to  
361 baseline testing, and were in the chamber for 10 minutes before recording began each day.



362 Before the procedure and on days 1, 3, and 5 after injury, we video recorded mice for 10 minutes  
363 in clear acrylic chambers (4.3 W x 4.3 H x 11 L cm) on a mesh platform from the small end of  
364 the chamber with a camcorder (Sony, HVC) with digital zoom. A 3-way mirror was placed at  
365 the back of one end to facilitate assessment of unilateral grooming and to prevent the mouse  
366 from viewing the next acclimating mouse. From the 10-minute video, one still image for every  
367 second of video was extracted using Video to Picture Converter Software (Hootech). From these  
368 ~600 images, 10 were selected that contained a clear view of the animal's face. All of the 480  
369 selected baseline, sham, and post-pulp exposure images were cropped to show only the face and  
370 randomized for scoring in a Power Point file. Scoring was performed blind to day and treatment,  
371 as indicated in the original method for 5 action units (orbital tightening, nose bulge, cheek bulge,  
372 ear position and whisker change), from 0 (not present) to 2 (very visible), and action units were  
373 averaged to arrive at the score for each image<sup>13</sup>. In some cases, the whiskers could not be  
374 viewed, so this unit was omitted for the score of that image. Performing the statistical analysis  
375 with or without the whisker change action unit did not affect the overall statistical results. For  
376 example images of a mouse before and after pulp exposure, see Fig. 2 A,B.

377

### 378 **Mechanical Allodynia Assessment by Von Frey**

379

380 For these studies we placed the animals in confined chambers with adjustable openings (Fig. 3).  
381 The mice were contained chamber about 7cm in all directions, with an opening as wide as 2.5  
382 cm. The animals were acclimated to the chambers once for 30 minutes the day prior to baseline  
383 testing. Their natural tendency is to put their face out of the opening when it is wide enough, but  
384 they are elevated from the floor, which prevents immediate escape. In this way, we can prompt  
385 the animal to present its face for stimulation. We then stimulated twice on either side of the face,  
386 alternating between sides, aiming for the region including the vibrissae to the point in front of the  
387 eyes. The animal's response was scored from 0 to 4 based on early work in rats with neuropathic  
388 injury<sup>15,50</sup> (see Table 1 for score description). We considered "threshold" to be the filament that  
389 either produced a score of 3 followed by a response of 2 or more, or the point the animal was no  
390 longer willing to pass its face out of the opening after about 5 minutes. The animals were tested  
391 on days 2, 4, and 6 post injury with the full filament series (Baseline Tactile Sensory Evaluators,  
392 consisting of 11 graded filaments from 0.008g to 4g).

393

394 **Table 1. Score for Responses to Facial Von Frey**

| Score | Response                                                                        |
|-------|---------------------------------------------------------------------------------|
| 0     | no response                                                                     |
| 1     | orientation to the stimulus or a slower head turn away from the stimulus        |
| 2     | a rapid withdrawal that may or may not be followed by a single facial wipe      |
| 3     | attacking or biting the filament or rapid withdrawal followed by 2 facial wipes |
| 4     | a rapid withdrawal with multiple facial wipes                                   |

395

### 396 **Preparation of Tissue for Histology**

397

398 At 1 day post-injury, sham and naive, mice were deeply anesthetized with ketamine/xylazine and  
399 perfused with cold Phosphate Buffered Saline followed by 4% paraformaldehyde through the  
400 heart. We removed their trigeminal ganglia and either the remaining cranium or just the portion  
401 of the mouth containing the teeth and nerve roots. Trigeminal ganglia and mandible regions

402 were post fixed for up to 4 hours and overnight, respectively. Trigeminal ganglia were placed in  
403 30% sucrose until they sunk (overnight), and then frozen in Neg50 media for cryosectioning  
404 (20 $\mu$ m). Teeth were placed in 10% EDTA for approximately two weeks to decalcify,  
405 cryoprotected in 30% sucrose, embedded and cryosectioned (20  $\mu$ m). All tissues were sectioned  
406 on a Leica cryostat onto superfrost plus slides, in a series of 16 (TGs) or 10 (teeth). Adjacent  
407 series of TG sections were selected for in situ hybridization using the RNAScope system for 2  
408 probes. Four sections per left and right TGs from 3 animals were mounted on one slide. One  
409 series from the teeth underwent standard hematoxylin and eosin staining to visualize injury  
410 related alterations in the tissue.

411

### 412 ***In Situ* Hybridization using RNAScope**

413

414 Trigeminal ganglia were prepared using a modified version of the manufacturer's  
415 recommendations for fixed frozen tissues used for fluorescence visualization. Briefly, slides  
416 were dehydrated in a graded series of alcohol, peroxidase activity was blocked with hydrogen  
417 peroxide, and protease IV was applied to the tissue for 30 minutes at room temperature before  
418 undergoing the RNAScope Multiplex Fluorescent v2 assay (ACD). The assay was performed  
419 according to the manufacturer's protocol using two probes. TG sections were assessed for  
420 overlap between Tlr4 (channel 1) and either Trpa1, Trpv1, or Mrgprd (channel 2). Channel 1  
421 was visualized using opal dye 520 and channel 2 was visualized with opal dye 570 (1:1500 for  
422 both dyes). Tissues were imaged on a Leica SPE TCM using the same laser power and gain  
423 settings for all slides. Because we did not know the time course of pain changes in our DPI  
424 model, we opted to leave the pulp exposed, rather than applying a dye after exposure and sealing  
425 it and the injury site. Thus, we could not be fully certain that the neurons we visualized in the  
426 trigeminal ganglion came from the tooth pulp versus other trigeminal tissues. However, our own  
427 preliminary studies and others<sup>24</sup> have shown that maxillary molar labeling with the DiI paste  
428 Neurotrace (Invitrogen) results in positive cells in all branches of the trigeminal nerve, therefore  
429 we imaged cell clusters observed in both the region where V3 and V2 meet, as well as the region  
430 where V1 and V2 meet, resulting in 2 images per section with the 20x objective. All cells with  
431 detectable signal were selected for quantification and the signal intensity of mRNA clusters  
432 observed within each cell was analyzed by drawing a region of interest around each cell and  
433 mean signal intensity in arbitrary units generated by ImageJ software was noted. The dimensions  
434 of the region of interest were kept constant throughout the analysis to avoid bias. This process  
435 was repeated for each channel including overlay images. The entire quantification was  
436 performed by an observer in a manner blinded to mRNA probes and channel assignments.

437

### 438 **Statistical Analysis**

439

440 Data were assessed for normality using the Shapiro-Wilkes test. Raw Von Frey thresholds were  
441 log-transformed to achieve normality so that parametric statistical tests could be used. For Von  
442 Frey and Grimace behaviors, two-way ANOVA with repeated measures and between subjects  
443 effects were used to determine if there were any significant effects of time, treatment, or a  
444 significant interaction, followed by with post-hoc Dunnett's and Sidak tests where appropriate.  
445 For fluorescence intensity, an independent sample t-test was used. We consider  $p < 0.05$   
446 significant, and used Graph Pad Prism (v8).

## 447 References

- 448
- 449 1 Cohen, L. A. *et al.* Coping with Toothache Pain: A Qualitative Study of Low-Income  
450 Persons and Minorities. *Journal of Public Health Dentistry* **67**, 28-35,  
451 doi:doi:10.1111/j.1752-7325.2007.00005.x (2007).
- 452 2 Erdogan, O., Malek, M., Janal, M. N. & Gibbs, J. L. Sensory testing associates with pain  
453 quality descriptors during acute dental pain. *European Journal of Pain* **Jun 26**. doi:  
454 **10.1002/ejp.1447**. [Epub ahead of print], doi:10.1002/ejp.1447 (2019).
- 455 3 Nixdorf, D. R. *et al.* Frequency, impact, and predictors of persistent pain after root canal  
456 treatment: a national dental PBRN study. *PAIN* **157**, 159-165,  
457 doi:10.1097/j.pain.0000000000000343 (2016).
- 458 4 Vena, D. A. *et al.* Prevalence of Persistent Pain 3 to 5 Years Post Primary Root Canal  
459 Therapy and Its Impact on Oral Health–Related Quality of Life: PEARL Network  
460 Findings. *Journal of Endodontics* **40**, 1917-1921,  
461 doi:<https://doi.org/10.1016/j.joen.2014.07.026> (2014).
- 462 5 Reda, S. F., Reda, S. M., Thomson, W. M. & Schwendicke, F. Inequality in Utilization of  
463 Dental Services: A Systematic Review and Meta-analysis. *American Journal of Public*  
464 *Health* **108**, E1-E7, doi:<http://dx.doi.org/10.2105/AJPH.2017.304180> (2018).
- 465 6 Gibbs, J. L., Urban, R. & Basbaum, A. I. Paradoxical surrogate markers of dental injury-  
466 induced pain in the mouse. *PAIN®* **154**, 1358-1367,  
467 doi:<https://doi.org/10.1016/j.pain.2013.04.018> (2013).
- 468 7 Lin, J.-J. *et al.* Toll-like receptor 4 signaling in neurons of trigeminal ganglion contributes  
469 to nociception induced by acute pulpitis in rats. *Scientific Reports* **5**, 12549,  
470 doi:10.1038/srep12549
- 471 <https://www.nature.com/articles/srep12549#supplementary-information> (2015).
- 472 8 Shang, L., Xu, T.-L., Li, F., Su, J. & Li, W.-G. Temporal Dynamics of Anxiety Phenotypes  
473 in a Dental Pulp Injury Model. *Molecular Pain* **11**, s12990-12015-10040-12993,  
474 doi:10.1186/s12990-015-0040-3 (2015).
- 475 9 Bradman, M. J. G., Ferrini, F., Salio, C. & Merighi, A. Practical mechanical threshold  
476 estimation in rodents using von Frey hairs/Semmes–Weinstein monofilaments: Towards  
477 a rational method. *Journal of Neuroscience Methods* **255**, 92-103,  
478 doi:<https://doi.org/10.1016/j.jneumeth.2015.08.010> (2015).
- 479 10 Abdus-Saboor, I. *et al.* Development of a mouse pain scale using sub-second behavioral  
480 mapping and statistical modeling. *Cell Reports In press* (2019).
- 481 11 Lee, C. S. *et al.* Molecular, cellular, and behavioral changes associated with pathological  
482 pain signaling occur after dental pulp injury. *Molecular Pain* **13**, 1744806917715173,  
483 doi:10.1177/1744806917715173 (2017).
- 484 12 Rodriguez, E. *et al.* A craniofacial-specific monosynaptic circuit enables heightened  
485 affective pain. *Nature Neuroscience* **20**, 1734 (2017).
- 486 13 Langford, D. J. *et al.* Coding of facial expressions of pain in the laboratory mouse.  
487 *Nature Methods* **7**, 447+ (2010).
- 488 14 Tuttle, A. H. *et al.* A deep neural network to assess spontaneous pain from mouse facial  
489 expressions. *Molecular Pain* **14**, 1744806918763658, doi:10.1177/1744806918763658  
490 (2018).
- 491 15 Vos, B., Strassman, A. & Maciewicz, R. Behavioral evidence of trigeminal neuropathic  
492 pain following chronic constriction injury to the rat's infraorbital nerve. *The Journal of*  
493 *Neuroscience* **14**, 2708-2723, doi:10.1523/jneurosci.14-05-02708.1994 (1994).
- 494 16 Kartha, S., Zhou, T., Granquist, E. J. & Winkelstein, B. A. Development of a Rat Model  
495 of Mechanically Induced Tunable Pain and Associated Temporomandibular Joint

- 496 Responses. *Journal of Oral and Maxillofacial Surgery* **74**, 54.e51-54.e10,  
497 doi:<https://doi.org/10.1016/j.joms.2015.09.005> (2016).
- 498 17 Dolan, J. C., Lam, D. K., Achdjian, S. H. & Schmidt, B. L. The dolognawmeter: A novel  
499 instrument and assay to quantify nociception in rodent models of orofacial pain. *Journal*  
500 *of Neuroscience Methods* **187**, 207-215,  
501 doi:<https://doi.org/10.1016/j.jneumeth.2010.01.012> (2010).
- 502 18 Hall, B. E. *et al.* Conditional TNF- $\alpha$  Overexpression in the Tooth and Alveolar Bone  
503 Results in Painful Pulpitis and Osteitis. *Journal of Dental Research* **95**, 188-195,  
504 doi:10.1177/0022034515612022 (2015).
- 505 19 Bruno, K. *et al.* Targeting toll-like receptor-4 (TLR4)-an emerging therapeutic target for  
506 persistent pain states. *Pain* **159**, 1908-1915, doi:10.1097/j.pain.0000000000001306  
507 (2018).
- 508 20 Wadachi, R. & Hargreaves, K. M. Trigeminal Nociceptors Express TLR-4 and CD14: a  
509 Mechanism for Pain due to Infection. *Journal of Dental Research* **85**, 49-53,  
510 doi:10.1177/154405910608500108 (2006).
- 511 21 Diogenes, A., Ferraz, C. C. R., Akopian, A. N., Henry, M. A. & Hargreaves, K. M. LPS  
512 Sensitizes TRPV1 via Activation of TLR4 in Trigeminal Sensory Neurons. *Journal of*  
513 *Dental Research* **90**, 759-764, doi:10.1177/0022034511400225 (2011).
- 514 22 Meseguer, V. *et al.* TRPA1 channels mediate acute neurogenic inflammation and pain  
515 produced by bacterial endotoxins. *Nature Communications* **5**, 3125,  
516 doi:10.1038/ncomms4125  
  
<https://www.nature.com/articles/ncomms4125#supplementary-information> (2014).
- 517 23 Michot, B., Casey, S., Lee, C. & Gibbs, J. (135) - LPS-induced neuronal activation and  
518 TRPA1 sensitization in trigeminal sensory neurons is dependent to TLR4 receptor. *The*  
519 *Journal of Pain* **19**, S10-S11, doi:<https://doi.org/10.1016/j.jpain.2017.12.049> (2018).
- 520 24 Kadala, A. *et al.* Fluorescent Labeling and 2-Photon Imaging of Mouse Tooth Pulp  
521 Nociceptors. *Journal of Dental Research* **97**, 460-466, doi:10.1177/0022034517740577  
522 (2018).
- 523 25 Chung, M.-K., Jue, S. S. & Dong, X. Projection of Non-peptidergic Afferents to Mouse  
524 Tooth Pulp. *Journal of Dental Research* **91**, 777-782, doi:10.1177/0022034512450298  
525 (2012).
- 526 26 Chung, M.-K., Lee, J., Duraes, G. & Ro, J. Y. Lipopolysaccharide-induced Pulpitis Up-  
527 regulates TRPV1 in Trigeminal Ganglia. *Journal of Dental Research* **90**, 1103-1107,  
528 doi:10.1177/0022034511413284 (2011).
- 529 27 Michot, B., Lee, C. S. & Gibbs, J. L. TRPM8 and TRPA1 do not contribute to dental pulp  
530 sensitivity to cold. *Scientific Reports* **8**, 13198, doi:10.1038/s41598-018-31487-2 (2018).
- 531 28 Cavanaugh, D. J. *et al.* Distinct Subsets of Unmyelinated Primary Sensory Fibers  
532 Mediate Behavioral Responses to Noxious Thermal and Mechanical Stimuli.  
533 *Proceedings of the National Academy of Sciences of the United States of America* **106**,  
534 9075-9080 (2009).
- 535 29 Owatz, C. B. *et al.* The Incidence of Mechanical Allodynia in Patients With Irreversible  
536 Pulpitis. *Journal of Endodontics* **33**, 552-556,  
537 doi:<https://doi.org/10.1016/j.joen.2007.01.023> (2007).
- 538 30 Renton, T. & Wilson, N. H. Understanding and managing dental and orofacial pain in  
539 general practice. *British Journal of General Practice* **66**, 236-237,  
540 doi:10.3399/bjgp16X684901 (2016).
- 541 31 Tsuboi, Y. *et al.* Modulation of astroglial glutamine synthetase activity affects nociceptive  
542 behaviour and central sensitization of medullary dorsal horn nociceptive neurons in a rat  
543 model of chronic pulpitis. *European Journal of Neuroscience* **34**, 292-302,  
544 doi:10.1111/j.1460-9568.2011.07747.x (2011).
- 545



- 546 32 Zhu, Y. *et al.* Effect of static magnetic field on pain level and expression of P2X3  
547 receptors in the trigeminal ganglion in mice following experimental tooth movement.  
548 *Bioelectromagnetics* **38**, 22-30, doi:10.1002/bem.22009 (2017).
- 549 33 Sperry, M. M., Yu, Y.-H., Welch, R. L., Granquist, E. J. & Winkelstein, B. A. Grading  
550 facial expression is a sensitive means to detect grimace differences in orofacial pain in a  
551 rat model. *Scientific Reports* **8**, 13894, doi:10.1038/s41598-018-32297-2 (2018).
- 552 34 Akintola, T. *et al.* The grimace scale reliably assesses chronic pain in a rodent model of  
553 trigeminal neuropathic pain. *Neurobiology of Pain* **2**, 13-17,  
554 doi:<https://doi.org/10.1016/j.ynpai.2017.10.001> (2017).
- 555 35 Bai, Q. *et al.* TNF $\alpha$  in the Trigeminal Nociceptive System Is Critical for  
556 Temporomandibular Joint Pain. *Molecular Neurobiology* **56**, 278-291,  
557 doi:10.1007/s12035-018-1076-y (2019).
- 558 36 Rea, B. J. a. *et al.* Peripherally administered calcitonin gene-related peptide induces  
559 spontaneous pain in mice: implications for migraine. *Pain* **159**, 2306-2317 (2018).
- 560 37 Ohara, K. *et al.* Toll-like receptor 4 signaling in trigeminal ganglion neurons contributes  
561 tongue-referred pain associated with tooth pulp inflammation. *Journal of*  
562 *Neuroinflammation* **10**, 139, doi:10.1186/1742-2094-10-139 (2013).
- 563 38 Watase, T. *et al.* Involvement of transient receptor potential vanilloid 1 channel  
564 expression in orofacial cutaneous hypersensitivity following tooth pulp inflammation.  
565 *Journal of Oral Science* **advpub**, doi:10.2334/josnusd.16-0854 (2018).
- 566 39 Haas, E. T., Rowland, K. & Gautam, M. Tooth injury increases expression of the cold  
567 sensitive TRP channel TRPA1 in trigeminal neurons. *Archives of Oral Biology* **56**, 1604-  
568 1609, doi:<https://doi.org/10.1016/j.archoralbio.2011.06.014> (2011).
- 569 40 Lennertz, R. C., Kossyрева, E. A., Smith, A. K. & Stucky, C. L. TRPA1 Mediates  
570 Mechanical Sensitization in Nociceptors during Inflammation. *PLoS ONE* **7**, e43597  
571 (2012).
- 572 41 Zylka, M. J., Rice, F. L. & Anderson, D. J. Topographically Distinct Epidermal  
573 Nociceptive Circuits Revealed by Axonal Tracers Targeted to Mrgprd. *Neuron* **45**, 17-25,  
574 doi:<https://doi.org/10.1016/j.neuron.2004.12.015> (2005).
- 575 42 Barabas, M. E., Kossyрева, E. A. & Stucky, C. L. TRPA1 Is Functionally Expressed  
576 Primarily by IB4-Binding, Non-Peptidergic Mouse and Rat Sensory Neurons. *PLoS ONE*  
577 **7**, e47988 (2012).
- 578 43 Wang, C. *et al.* Facilitation of MrgprD by TRP-A1 promotes neuropathic pain. *The*  
579 *FASEB Journal* **33**, 1360-1373, doi:10.1096/fj.201800615RR (2019).
- 580 44 Komiya, H. *et al.* Connexin 43 expression in satellite glial cells contributes to ectopic  
581 tooth-pulp pain. *Journal of Oral Science* **60**, 493-499, doi:10.2334/josnusd.17-0452  
582 (2018).
- 583 45 Jang, J.-H. *et al.* An Overview of Pathogen Recognition Receptors for Innate Immunity in  
584 Dental Pulp. *Mediators of Inflammation* **2015**, 12, doi:10.1155/2015/794143 (2015).
- 585 46 Zheng, J. *et al.* Microbiome of Deep Dentinal Caries from Reversible Pulpitis to  
586 Irreversible Pulpitis. *Journal of Endodontics* **45**, 302-309.e301,  
587 doi:<https://doi.org/10.1016/j.joen.2018.11.017> (2019).
- 588 47 Chiu, I. M. *et al.* Bacteria activate sensory neurons that modulate pain and inflammation.  
589 *Nature* **501**, 52+ (2013).
- 590 48 Hargreaves, K. M. & Ruparel, S. Role of Oxidized Lipids and TRP Channels in Orofacial  
591 Pain and Inflammation. *Journal of Dental Research* **95**, 1117-1123,  
592 doi:10.1177/0022034516653751 (2016).
- 593 49 Bautzova, T. *et al.* 5-oxoETE triggers nociception in constipation-predominant irritable  
594 bowel syndrome through MAS-related G protein-coupled receptor D. *Science Signaling*  
595 **11**, eaal2171, doi:10.1126/scisignal.aal2171 (2018).



596 50 Deseure, K., Koek, W., Adriaensen, H. & Colpaert, F. C. Continuous Administration of  
597 the 5-Hydroxytryptamine<sub>1A</sub> Agonist (3-Chloro-4-fluoro-phenyl)-[4-fluoro-4-  
598 {{(5-methyl-pyridin-2-ylmethyl)-amino}-methyl}piperidin-1-yl]-methadone (F 13640)  
599 Attenuates Allodynia-Like Behavior in a Rat Model of Trigeminal Neuropathic Pain.  
600 *Journal of Pharmacology and Experimental Therapeutics* **306**, 505-514,  
601 doi:10.1124/jpet.103.050286 (2003).

602  
603  
604  
605  
606
